# Supplementary material for: Robust COX-2-mediated prostaglandin response may drive arthralgia and bone destruction in patients with chronic inflammation post-chikungunya
Source: PubMed Central journal article supplement (PMC7920362; doi:10.1371/journal.pntd.0009115), 2021-02-17
Supplement: pntd.0009115.s001.pdf [file pntd.0009115.s001.pdf]

# Supplemental Figure 1A

Hygroma

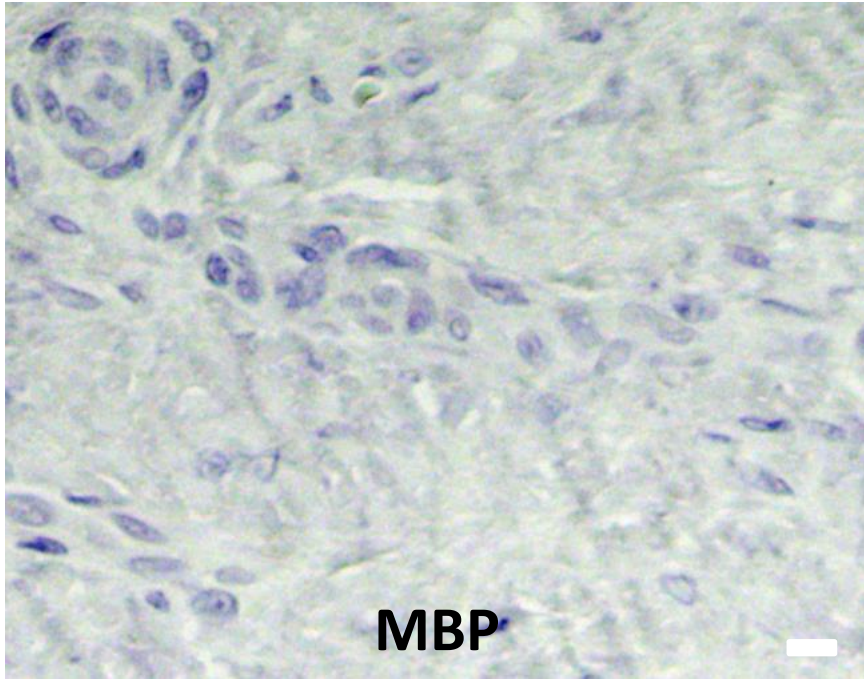

Hygroma

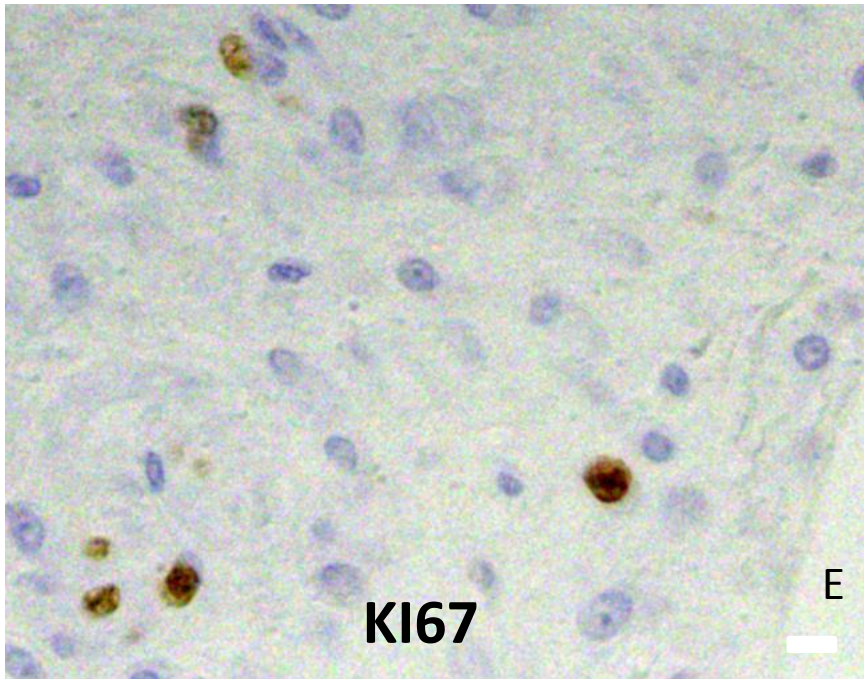

***Negative control (MBP)***  
***Cell proliferation (KI67)***

## Supplemental Figure 1B

Hygroma

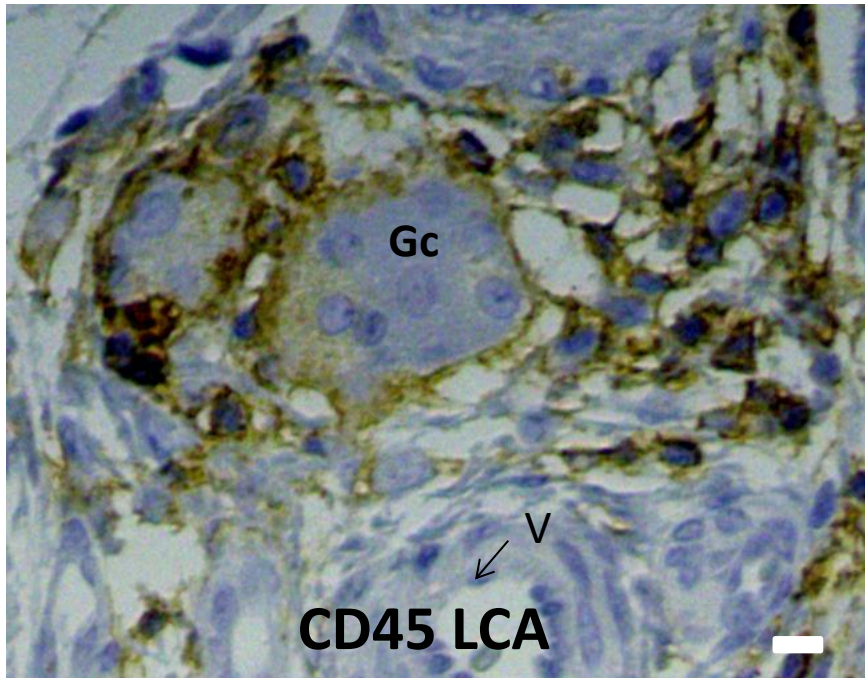

Hygroma

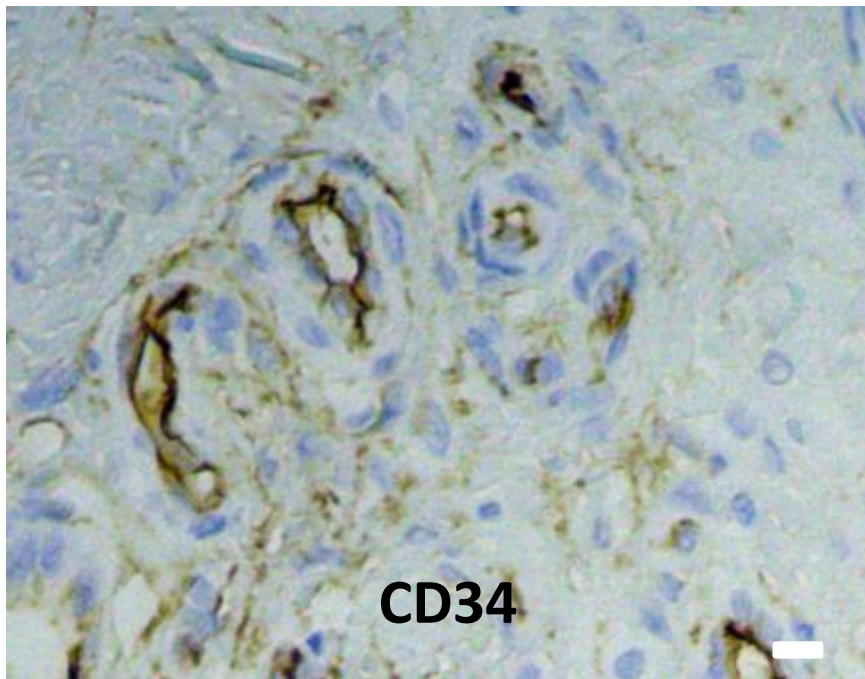

***Immune cell invasion (CD45)***  
***Major angiogenesis (CD34)***

## Supplemental Figure 1C

Hygroma

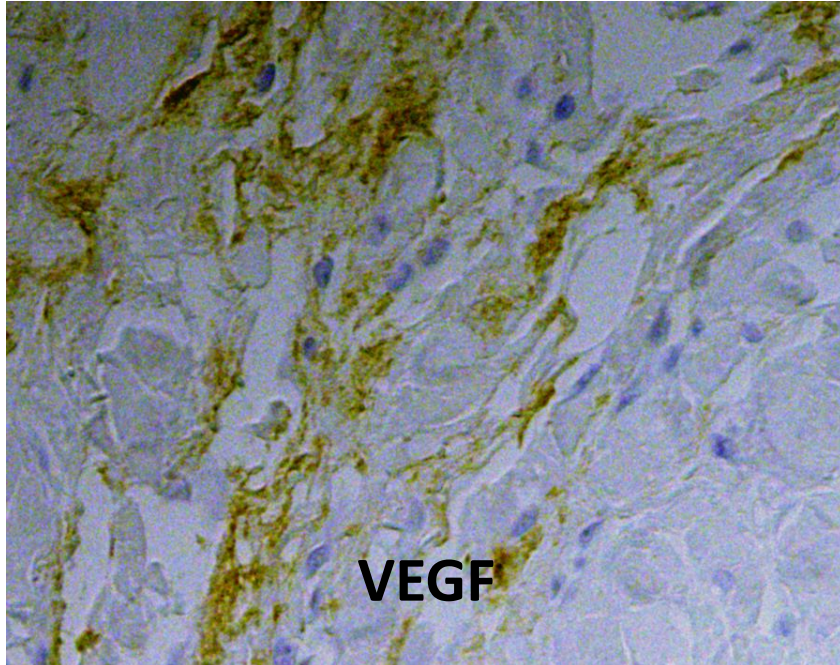

Hygroma

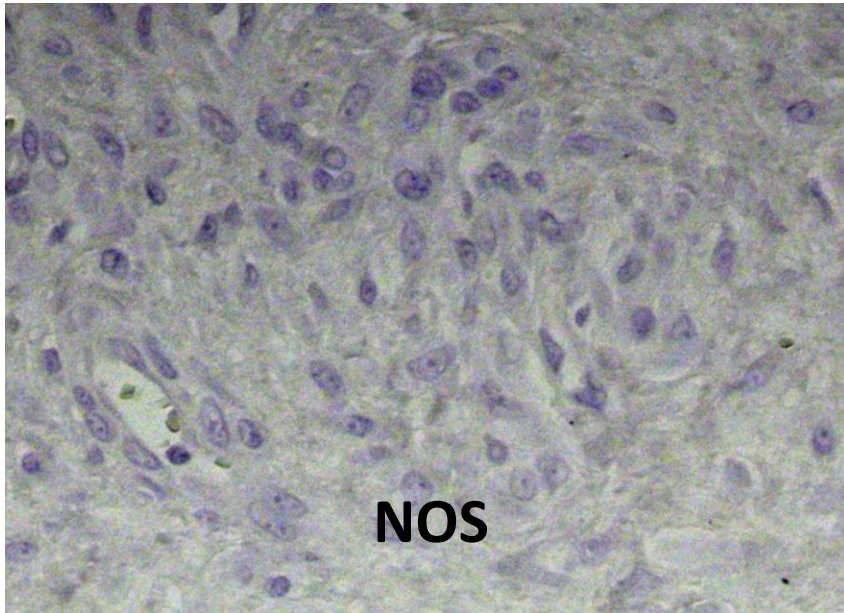

**Proangiogenic factor, VEGF**  
**Synthesis of Nitric Oxide by NOS**

Supplemental Figure 1D

Hygroma

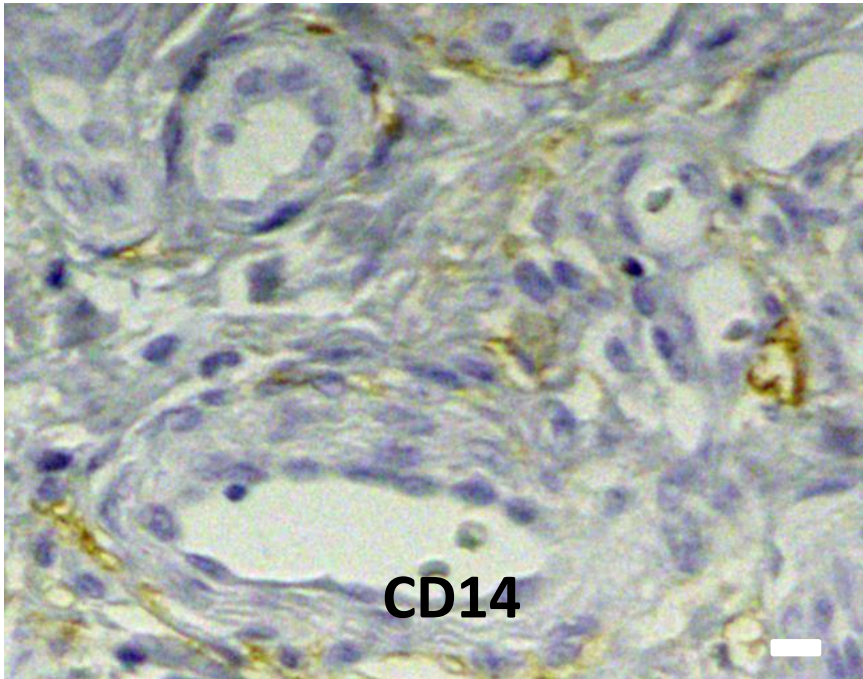

Hygroma

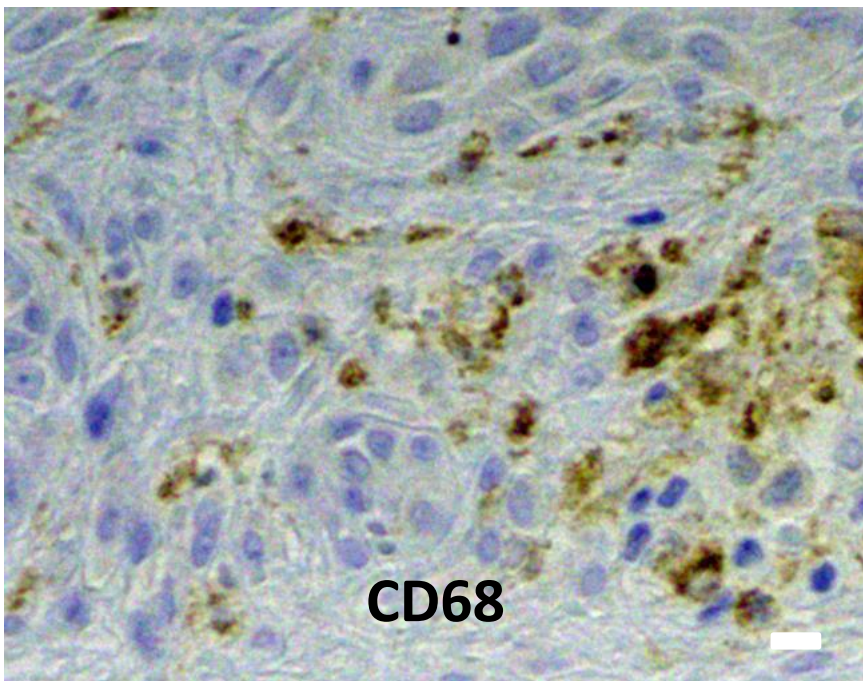

***Monocyte (CD14, perivascular)  
Parenchymal MØ cells (CD68)***

Supplemental Figure 1E

Hygroma

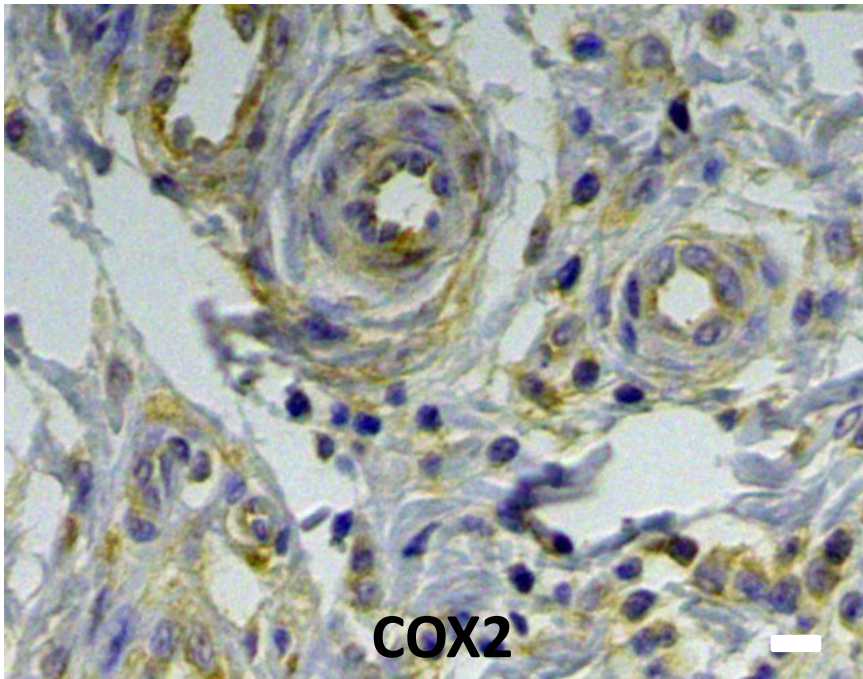

Hygroma

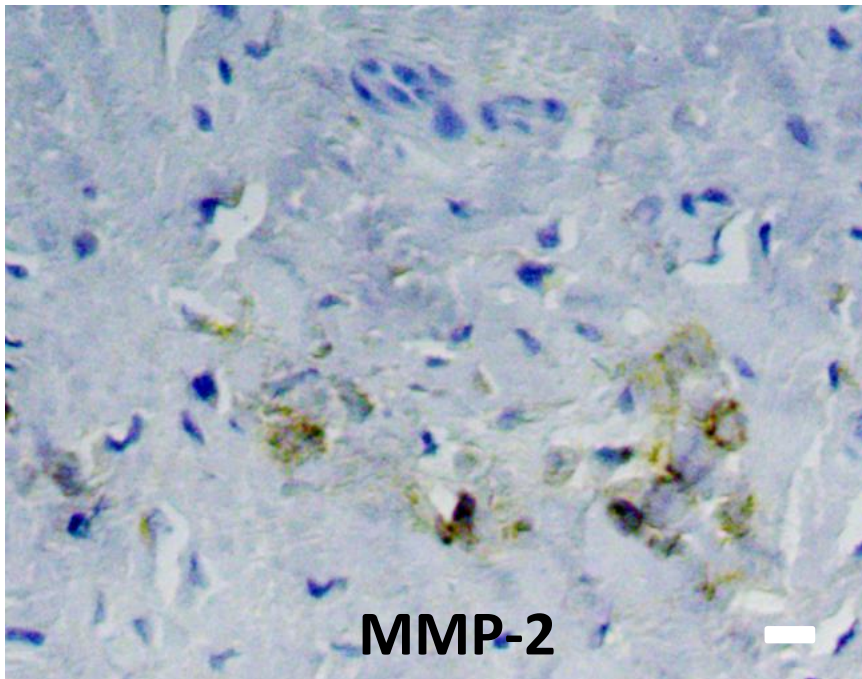

***Perivascular COX2***  
***Metalloprotease MMP2***

Supplemental Figure 1F

Hygroma

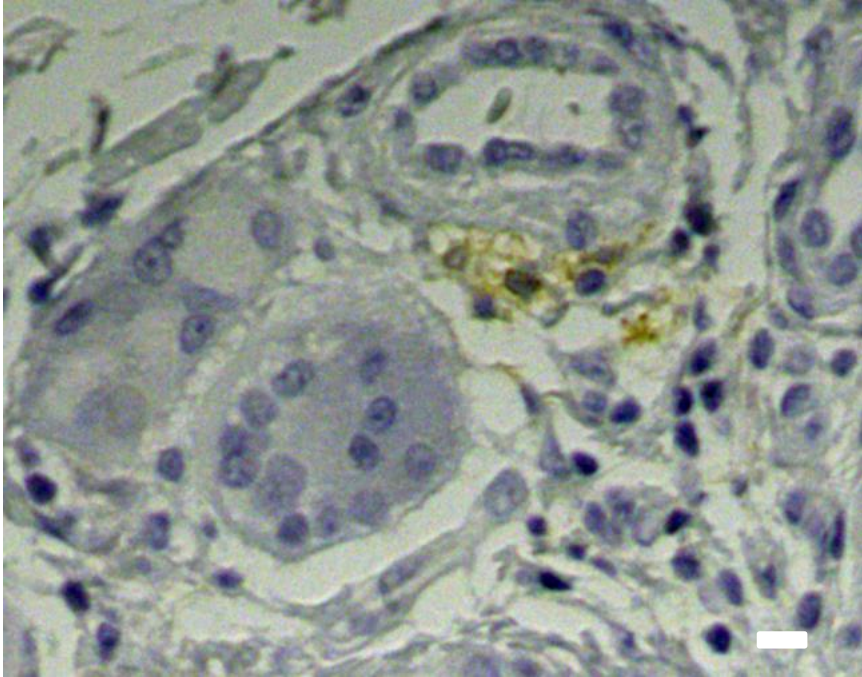

Spleen

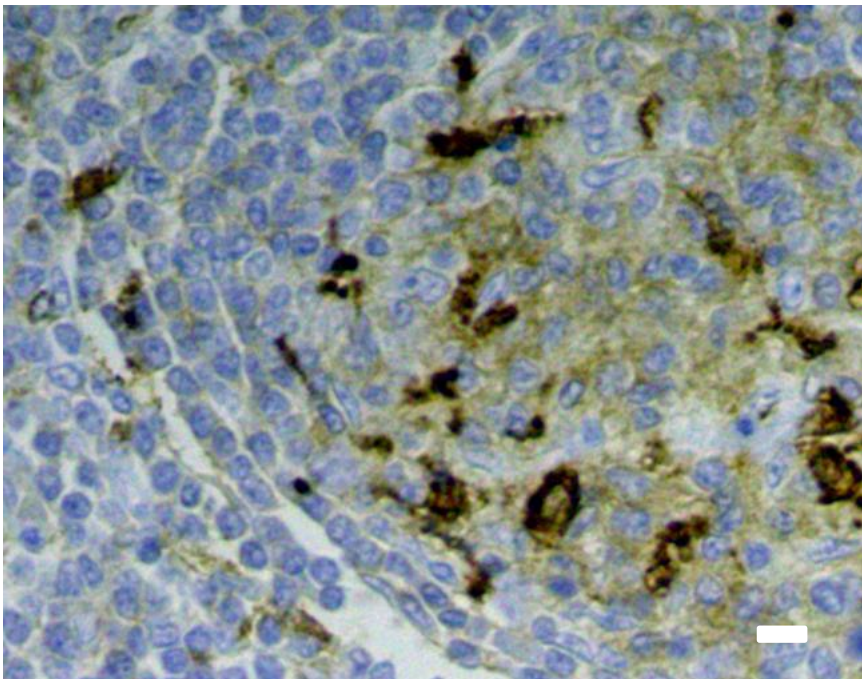

***Dendritic cells DEC205 / Hygroma  
DEC205 + control / Spleen***

Supplemental Figure 1G

Hygroma

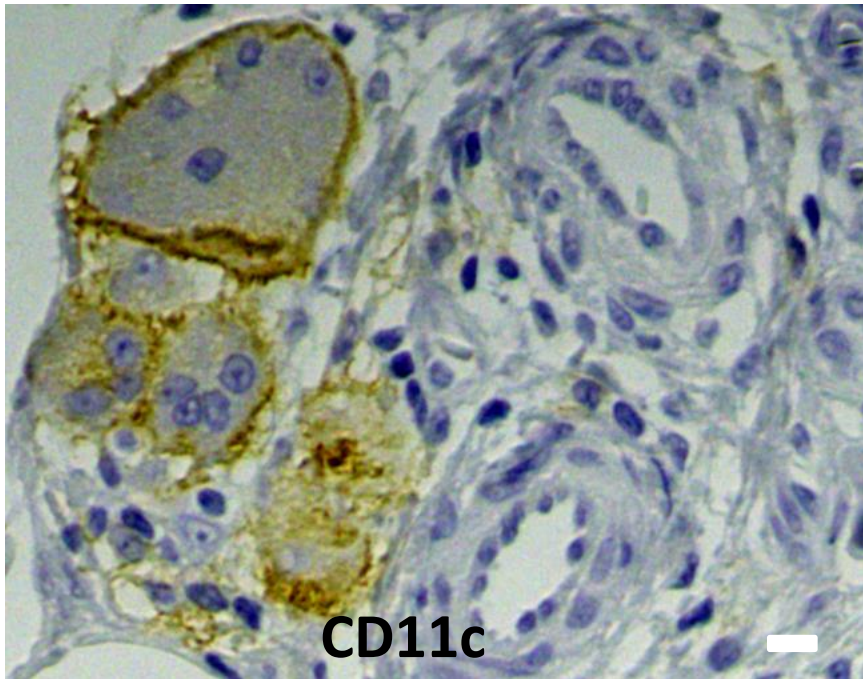

Spleen

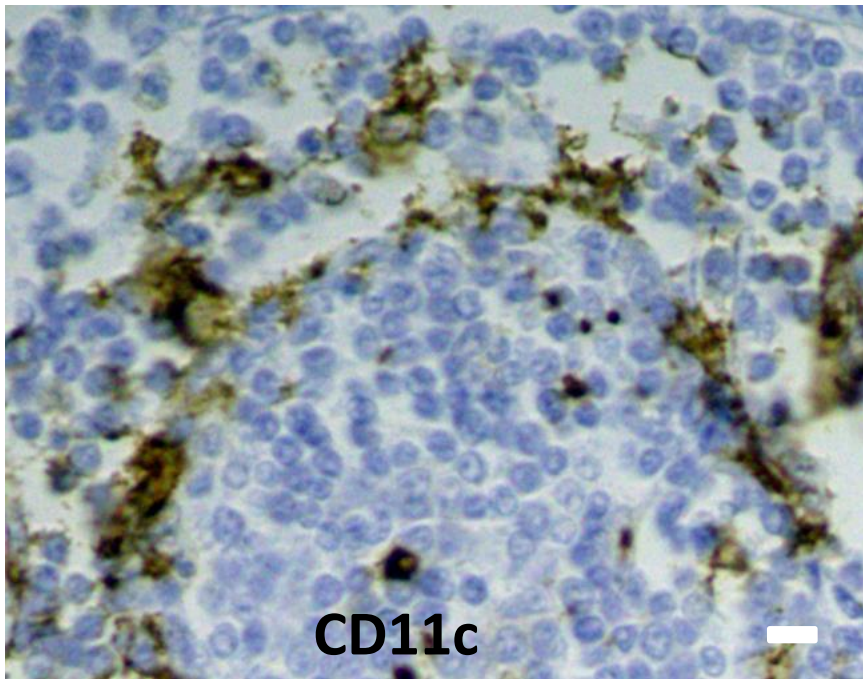

***Macrophage CD11c+ / hygroma  
CD11c+ control / Spleen***
